# Supplementary material for: Effectiveness of Telerehabilitation in Dizziness: A Systematic Review with Meta-Analysis
Source: MDPI journal article supplement (doi:10.3390/s24103028), 2024-05-10
Supplement: s1 [file s1]

## Supplementary Appendix SA

*PubMed research string:*

("benign paroxysmal positional vertigo/nursing"[MeSH Terms] OR "benign paroxysmal positional vertigo/rehabilitation"[MeSH Terms] OR "vertigo/nursing"[MeSH Terms] OR "vertigo/rehabilitation"[MeSH Terms] OR "vertigo/therapy"[MeSH Terms] OR "labyrinth diseases/nursing"[MeSH Terms] OR "labyrinth diseases/rehabilitation"[MeSH Terms] OR "labyrinth diseases/therapy"[MeSH Terms] OR "vestibular diseases/nursing"[MeSH Terms] OR "vestibular diseases/rehabilitation"[MeSH Terms] OR "vestibular diseases/therapy"[MeSH Terms] OR "dizziness/nursing"[MeSH Terms] OR "dizziness/rehabilitation"[MeSH Terms] OR "dizziness/therapy"[MeSH Terms] OR "acute peripheral vestibulopathies"[All Fields] OR "acute peripheral vestibulopathy"[All Fields] OR "acute vestibular neuritis"[All Fields] OR "acute vestibular neuritis"[All Fields] OR "vestibular syndrome"[All Fields] OR "vestibular disorders"[All Fields] OR "chronic vestibular dysfunction"[All Fields] OR "vestibular balance disorders"[All Fields] OR "chronic vestibular insufficiency"[All Fields] OR "Benign Paroxysmal Positional Vertigo"[MeSH Terms] OR "meniere disease"[MeSH Terms]) OR "Benign Paroxysmal Positional Vertigo"[All Fields] OR "Peripheral vestibular dysfunction"[All Fields] OR "Vestibular migraine"[All Fields] OR "Meniere's disease"[All Fields] OR "Meniere's syndrome"[All Fields] OR "Benign Paroxysmal Positional Vertigo"[All Fields] OR "BPPV"[All Fields] OR "Vestibular nerve"[All Fields] OR "endolymphatic hydrops"[MeSH Terms] OR "endolymphatic hydrops"[All Fields] OR "cervicogenic dizziness" OR "cervical vertigo" OR "dizziness" OR "vertigo" OR ((("Dizziness/rehabilitation"[Mesh]) OR ("Dizziness/therapy"[Mesh] )) OR ( "Vertigo/rehabilitation"[Mesh] OR "Vertigo/therapy"[Mesh] ) AND ("telerehab\*" [All Fields] OR "tele rehab\*" [All Fields] OR "telemed\*" [All Fields] OR "tele med\*" [All Fields] OR "telehealth\*" [All Fields] OR "tele health\*" [All Fields] OR "teleconsult\*" [All Fields] OR "tele consult\*" [All Fields] OR "teleconf\*" [All Fields] OR "tele conf\*" [All Fields] OR "telehom\*" [All Fields] OR "tele hom\*" [All Fields] OR "telecoach\*" [All Fields] OR "tele coach\*" [All Fields] OR "telecare\*" [All Fields] OR "tele care\*" [All Fields] OR "teletherap\*" [All Fields] OR "tele therap\*" [All Fields] OR "erehab\*" [All Fields] OR "e rehab\*" [All Fields] OR "ehealth\*" [All Fields] OR "e health\*" [All Fields] OR "emed\*" [All Fields] OR "e med\*" [All Fields] OR "virtual rehab\*" [All Fields] OR "videoconf\*" [All Fields] OR "technology based\*" [All Fields] OR "internet based\*" [All Fields] OR "remote\*" [All Fields] OR "telemedicine"[MeSH Terms] OR "telemetry"[MeSH Terms] OR "videoconferencing"[MeSH Terms] OR "user computer interface"[MeSH Terms] OR "Telerehabilitation"[MeSH Terms])

*Cochrane research string:*

"vestibular syndrome" OR "vestibular disorders" OR "labyrinth diseases" OR "acute peripheral vestibulopat\*" OR "acute peripheral vestibulopat\*" OR "acute vestibular neuritis" OR "chronic vestibular dysfunction" OR "vestibular balance disorder\*" OR "chronic vestibular insufficiency" OR "benign paroxysmal positional vertigo" OR "BPPV" OR "peripheral vestibular dysfunction" OR "vestibular migraine" OR "Meniere's disease" OR "meniere's syndrome" OR "cervical dizziness" OR "cervical vertigo" OR "dizziness" OR "vertigo" OR MeSH descriptor: [Dizziness] explode all trees OR MeSH descriptor: [Vestibular Diseases] explode all trees AND "telerehab\*" OR "tele rehab\*" OR "telemed\*" OR "tele med\*" OR "telehealth\*" OR "tele health\*" OR "teleconsult\*" OR "tele consult\*" OR "teleconf\*" OR "tele conf\*" OR "telehom\*" OR "tele hom\*" OR "telecoach\*" OR "tele coach\*" OR "telecare\*" OR "tele care\*" OR "teletherap\*" OR "teletherap\*" OR "erehab\*" OR "e rehab\*" OR "ehealth\*" OR "e health\*" OR

"emed\*" OR "e med\*" OR "virtual rehab\*" OR "videoconf\*" OR "technology based\*" OR "internet based\*" OR "remote\*" OR "telemedicine" OR "telemetry" OR "videoconferencing" OR "user computer interface" OR "Telerehabilitation" OR MeSH descriptor: [Telerehabilitation] explode all trees

*Pedro research string: free terms:*

- Tele rehabilitation
- Tele
- Vestibular disorders
- Dizziness
- Vertigo

## Supplementary Appendix SB

**Table S1.** Study eligibility criteria.

| Inclusion                                                                                                                                                                                                                                                                                                                                                                                                                                                                                                                                                                                                                                                                                                                                                                                                                                                                                                                                      | Exclusion                                                                                                                                                                                                                                                                                                                                                       |
|------------------------------------------------------------------------------------------------------------------------------------------------------------------------------------------------------------------------------------------------------------------------------------------------------------------------------------------------------------------------------------------------------------------------------------------------------------------------------------------------------------------------------------------------------------------------------------------------------------------------------------------------------------------------------------------------------------------------------------------------------------------------------------------------------------------------------------------------------------------------------------------------------------------------------------------------|-----------------------------------------------------------------------------------------------------------------------------------------------------------------------------------------------------------------------------------------------------------------------------------------------------------------------------------------------------------------|
| <p><i>Population</i></p> <ul style="list-style-type: none"> <li>• Adult participants (age ≥18 years) with vertigo symptoms of various etiologies, regardless the timing of symptoms (acute or chronic), that received rehabilitation treatment through tele-rehabilitation. Etiology can include central, peripheral, nonspecific, cervicogenic causes.</li> </ul>                                                                                                                                                                                                                                                                                                                                                                                                                                                                                                                                                                             |                                                                                                                                                                                                                                                                                                                                                                 |
| <p><i>Interventions</i></p> <ul style="list-style-type: none"> <li>• Rehabilitation treatments through tele-rehabilitation provided remotely, both synchronous and asynchronous, which include: <ul style="list-style-type: none"> <li>- Remote rehabilitation sessions with a therapist.</li> <li>- Tele-consultation sessions with a therapist and individual treatment independently of the patient.</li> <li>- Alternating tele-consultation/remote rehabilitation sessions and presence sessions. Monitoring through tele-consultation, presence rehabilitation treatment.</li> <li>- Remote consultation/rehabilitation sessions and other forms of treatment (face to face, internet-based interventions, digital platforms or software or applications).</li> <li>- Remote asynchronous teleconsultation/rehabilitation sessions (internet-based interventions, digital platforms or software or applications).</li> </ul> </li> </ul> | <ul style="list-style-type: none"> <li>• rehabilitation treatments carried autonomously and remotely by patient, even through technologies (i.e. digital platform, website etc), but no performance data is provided or displayed by the therapist through information and communication technologies (no synchronous or asynchronous data sharing).</li> </ul> |

|                                                                                                                                                                                                                                                                                                                                                                                                                                |                                                                                                                              |
|--------------------------------------------------------------------------------------------------------------------------------------------------------------------------------------------------------------------------------------------------------------------------------------------------------------------------------------------------------------------------------------------------------------------------------|------------------------------------------------------------------------------------------------------------------------------|
| <i>Control</i> <ul style="list-style-type: none"> <li>Any other treatment not delivered through telerehabilitation, such as: <ul style="list-style-type: none"> <li>In presence rehabilitation alone;</li> <li>Remote therapy sessions without any data exchange through information and communication technologies;</li> <li>Usual care (education, pharmacologic support, etc).</li> </ul> </li> <li>No treatment</li> </ul> |                                                                                                                              |
| <i>Outcomes</i> <ul style="list-style-type: none"> <li>Primary: <ul style="list-style-type: none"> <li>reduction of vertigo symptoms</li> </ul> </li> <li>Secondary: <ul style="list-style-type: none"> <li>improvement of quality of life, improvement of psychological impairments..</li> </ul> </li> </ul>                                                                                                                  |                                                                                                                              |
| <i>Study design</i> <ul style="list-style-type: none"> <li>randomised controlled trial (RCT)</li> </ul>                                                                                                                                                                                                                                                                                                                        | <ul style="list-style-type: none"> <li>Other designs: systematic reviews, cohort trials, case trials/ case series</li> </ul> |
| <i>Publication type</i> <ul style="list-style-type: none"> <li>full-text study publications</li> </ul>                                                                                                                                                                                                                                                                                                                         |                                                                                                                              |
| <i>Publication Period</i> <ul style="list-style-type: none"> <li>no limits</li> </ul>                                                                                                                                                                                                                                                                                                                                          |                                                                                                                              |
| <i>Language</i> <ul style="list-style-type: none"> <li>english, italian</li> </ul>                                                                                                                                                                                                                                                                                                                                             |                                                                                                                              |

**Table S2.** List of xcluded studies.

| <b>Title</b>                                                                                                                                                                             | <b>Year</b> | <b>Study design</b> | <b>Exclusion reason</b>          |
|------------------------------------------------------------------------------------------------------------------------------------------------------------------------------------------|-------------|---------------------|----------------------------------|
| Effect of Self-treatment of Recurrent Benign Paroxysmal Positional Vertigo: A randomized clinical trial.                                                                                 | 2023        | RCT                 | Full text not available          |
| Home-based Vestibular Rehabilitation: A Feasible and Effective Therapy for Persistent Postural Perceptual Dizziness.                                                                     | 2023        | PILOT RCT           | Not Telerehabilitation treatment |
| Effectiveness of conventional versus virtual reality-based vestibular rehabilitation exercises in elderly patients with dizziness: a randomized controlled study with 6-month follow-up. | 2022        | RCT                 | Not Telerehabilitation treatment |
| Comparison of Activity-Based Home Program an Cawthorne-Cooksey Exercises in Patients With Chronic Unilateral Peripheral Vestibular Disorders.                                            | 2021        | RCT                 | Not Telerehabilitation treatment |

|                                                                                                                                                                                |      |             |                                  |
|--------------------------------------------------------------------------------------------------------------------------------------------------------------------------------|------|-------------|----------------------------------|
| Vestibular rehabilitation in older adults with and without mild cognitive impairment: Effects of virtual reality using a head-mounted display.                                 | 2019 | RCT         | Not Telerehabilitation treatment |
| Vestibular rehabilitation using video gaming in adults with dizziness: a pilot study                                                                                           | 2018 | PILOT RCT   | Not Telerehabilitation treatment |
| The efficacy of a home treatment program combined with office-based canalith repositioning procedure for benign paroxysmal positional vertigo: a randomized controlled trial.  | 2019 | RCT         | Full text not available          |
| Reducing the burden of dizziness in middleaged and older people: A multifactorial, tailored, single-blind randomized controlled trial.                                         | 2018 | RCT         | CBT Telerehabilitation treatment |
| Web-Based Telepresence Exercise Program for Community-Dwelling Elderly Women With a High Risk of Falling: Randomized Controlled Trial.                                         | 2018 | RCT         | Consider different populations   |
| Internet-Based Self-Help for Ménière's Disease: Details and Outcome of a Single-Group Open Trial.                                                                              | 2017 | RCT         | Full text not available          |
| Three-dimensional head-mounted gaming task procedure maximizes effects of vestibular rehabilitation in unilateralvestibular hypofunction: a randomized controlled pilot trial. | 2017 | PILOT RCT   | Not Telerehabilitation treatment |
| ICT-based system to predict and prevent falls (iStoppFalls): results from an international multicenter randomized controlled trial.                                            | 2015 | RCT         | Consider different populations   |
| Home-Based Computer Gaming in Vestibular Rehabilitation of Gaze and Balance Impairment                                                                                         | 2015 | Case series | Study design not eligible        |
| Evaluation of Booklet-Based Self-Management of Symptoms in Meniere Disease: A Randomized Controlled Trial                                                                      | 2006 | RCT         | Not Telerehabilitation treatment |
| A randomized controlled trial of exercise therapy for dizziness and vertigo in primary care                                                                                    | 1998 | RCT         | Not Telerehabilitation treatment |
